# Supplementary material for: Mechanisms of Plant Growth Enhancement and Drought Tolerance Induced by Micro- Carbon™-Based Phosphorus (MCT-P)
Source: Research Square preprint supplement (doi:10.21203/rs.3.rs-7886535/v1), 2025-12-12

**Supplementary Material Santos et al., 2025**

Supplementary Table 1- The primers information

| Genes | Number NCBI | Forward Sequence | Reverse Sequence |
| --- | --- | --- | --- |
| **Zea mays sucrose transporter 1 (LOC541615)** | >[NM_001111370.3](https://www.ncbi.nlm.nih.gov/entrez/viewer.fcgi?db=nucleotide&id=809281411) | GCCTCCCAAAGCTCTCTTGT | TGTGATCGAAATCGAAGGGGA |
| **Zea mays plasma-membrane H+ATPase 2 (LOC542048)** | [NM_001305847.1](https://www.ncbi.nlm.nih.gov/entrez/viewer.fcgi?db=nucleotide&id=803378390) | TGGTTGGGTACCCGTCTTTC | AACGATTACAACACGCGCAC |
| **Zea mays regulatory-associated prot of TOR 1**  **(LOC103640651)** | [XM_023301204.2](https://www.ncbi.nlm.nih.gov/entrez/viewer.fcgi?db=nucleotide&id=1897957644) | GATGGTGTGAAGAGGCTCCC | GGAGGCGGCTAACGAATCTT |
| **Zea mays high affinity nitrate transporter (LOC778437) NAR2.1** | >[NM_001112459.2](https://www.ncbi.nlm.nih.gov/entrez/viewer.fcgi?db=nucleotide&id=1207734482) | AAGTAGAACGAGTTGCGGCT | AGCAACGACAGCCACTCATC |
| **Zea mays phosphate transporter protein1**  **(EU966504.1)**  **Zmpht1** | >NM001111799.2 | TTCCTTCCTGCACTGCACAT | ACACAGCCAGGGTTGACTTT |
| **Zea mays actin 2 (LOC100281811)** | >[NM_001154731.2](https://www.ncbi.nlm.nih.gov/entrez/viewer.fcgi?db=nucleotide&id=1212987645) | TGAAGCCATGTACAACTCCATCA | ATGCGGTCACCAATACCAGG |
| **Zea mays GADPH (LOC542367)** | >[NM_001111943.1](https://www.ncbi.nlm.nih.gov/entrez/viewer.fcgi?db=nucleotide&id=162460998) | CCCAGTAGGGGTTTTTCCCC | CACGCGCCATCCACATTTAT |
| **Zea mays nitrate reductase [NADH]-like (NNR1), mRNA** | >[NM_001305856.1](https://www.ncbi.nlm.nih.gov/entrez/viewer.fcgi?db=nucleotide&id=803378383) | ATAAACCAGCCGACTTGCCA | GCACAGTACAAGTGCAAACCT |
| **Zea mays auxin transporter-like protein 3 (LOC103654551)** | >[NM_001346984.1](https://www.ncbi.nlm.nih.gov/entrez/viewer.fcgi?db=nucleotide&id=1102130438) | AAGTGAGGCGACAGCTC | CATGTAGTTCCCTGCCACGA |

Supplementary Figure 1- One-week bioassay with MCT-P. Morphological data of corn seedlings: Shoot fresh weight (A), shoot dry weight (B), root fresh weight (C), root dry weight (D), total root length (E), and root surface area. The error bars represent confidence intervals of 15 plants. The experiments were replicated at least 3 times. The second-degree polynomial regression, and the first derivative that revealed the best rate are shown.


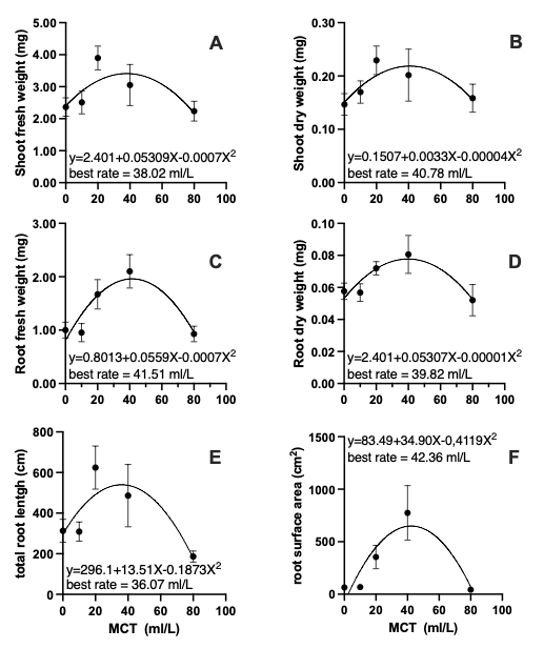


Supplementary Figure 2- Two-weeks bioassay with MCT-P. Morphological data of corn seedlings: root total length (A), root surface area (B), number of roots of class diameter 0<0.25 mm, and (C), root volume (D). The error bars represent confidence intervals of 15 plants. The experiments were replicated at least 2 times.


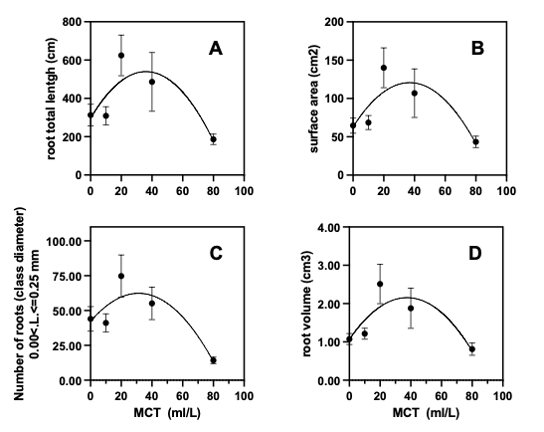


Supplementary Figure 3 - Two-weeks bioassay with MCT-P. Morphological data of lettuce: root surface area (A), total root length (B), root diameter (C), fresh root weight (D), root volume fresh shoot weight (E). The error bars represent confidence intervals of 12 plants. The experiments were replicated at least 2 times.


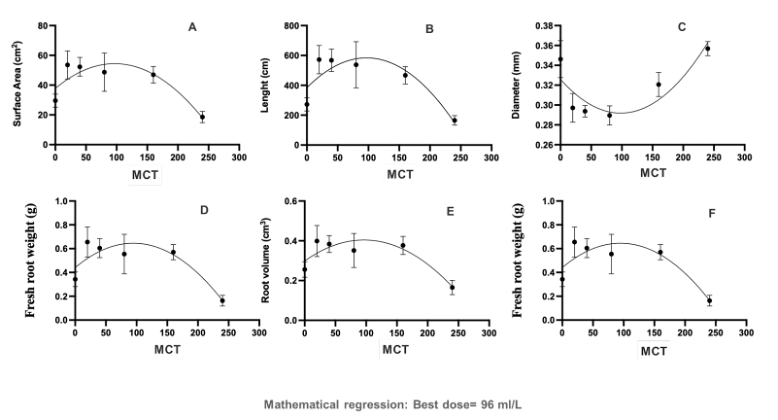


Supplementary Figure 4 - Representative image of the dose response curves in corn (A) and lettuce (B).


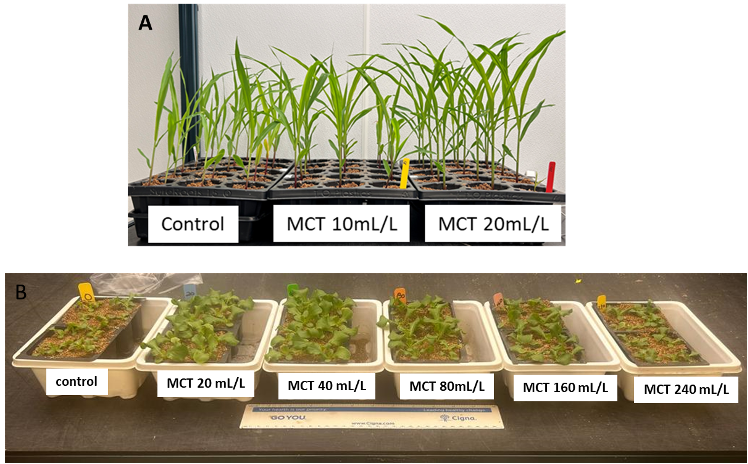


Supplementary Figure 5 - Representative image of the drought stress experiment carried out with corn. Photo (A) shows plants treated with MCT-P and control under drought stress; B to D show details of plants treated with MCT-P during stress where the leaves show curling and dark green color and without color changes in the veins; E to G show details of the control plants during stress, showing a darker color of the leaves and reddish veins. H- Plants 24 hours after re-irrigation.


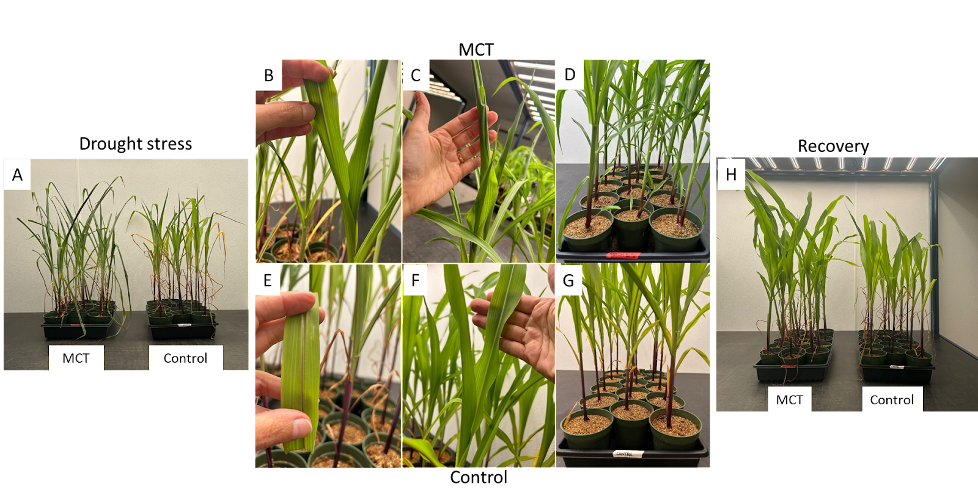

Supplement: Supplementary file 1 [file 13c9cea00f1ca85bf96429bd.docx]
